# Kinship Shapes Affiliative Social Networks but Not Aggression in Ring-Tailed Coatis

Ben T. Hirsch<sup>1,2,3\*</sup>, Margaret A. Stanton<sup>4</sup>, Jesus E. Maldonado<sup>3,5</sup>

**1** School of Environment and Natural Resources, Ohio State University, Columbus, Ohio, United States of America, **2** Smithsonian Tropical Research Institute, Panama City, Panama, **3** Center for Conservation and Evolutionary Genetics, Smithsonian Conservation Biology Institute, National Zoological Park, Washington, D.C., United States of America, **4** Department of Biology, Georgetown University, Washington, D.C., United States of America, **5** Department of Vertebrate Zoology, National Museum of Natural History, Smithsonian Institution, Washington, D.C., United States of America

## Abstract

Animal groups typically contain individuals with varying degrees of genetic relatedness, and this variation in kinship has a major influence on patterns of aggression and affiliative behaviors. This link between kinship and social behavior underlies socioecological models which have been developed to explain how and why different types of animal societies evolve. We tested if kinship and age-sex class homophily in two groups of ring-tailed coatis (*Nasua nasua*) predicted the network structure of three different social behaviors: 1) association, 2) grooming, and 3) aggression. Each group was studied during two consecutive years, resulting in four group-years available for analysis (total of 65 individuals). Association patterns were heavily influenced by agonistic interactions which typically occurred during feeding competition. Grooming networks were shaped by mother-offspring bonds, female-female social relationships, and a strong social attraction to adult males. Mother-offspring pairs were more likely to associate and groom each other, but relatedness had no effect on patterns of aggressive behavior. Additionally, kinship had little to no effect on coalitionary support during agonistic interactions. Adult females commonly came to the aid of juveniles during fights with other group members, but females often supported juveniles who were not their offspring (57% of coalitionary interactions). These patterns did not conform to predictions from socioecological models.

**Citation:** Hirsch BT, Stanton MA, Maldonado JE (2012) Kinship Shapes Affiliative Social Networks but Not Aggression in Ring-Tailed Coatis. PLoS ONE 7(5): e37301. doi:10.1371/journal.pone.0037301

**Editor:** Jane M. Waterman, University of Manitoba, Canada

**Received:** November 18, 2011; **Accepted:** April 19, 2012; **Published:** May 18, 2012

**Copyright:** © 2012 Hirsch et al. This is an open-access article distributed under the terms of the Creative Commons Attribution License, which permits unrestricted use, distribution, and reproduction in any medium, provided the original author and source are credited.

**Funding:** This study was funded by a NSF doctoral dissertation improvement grant (BCS-0314525), the Smithsonian Institution postdoctoral fellowship program, the Smithsonian Undersecretary for Science restricted endowment funds, and the Center for Conservation and Evolutionary Genetics at Smithsonian Conservation Biology Institute. The funders had no role in study design, data collection and analysis, decision to publish, or preparation of the manuscript.

**Competing Interests:** The authors have declared that no competing interests exist.

\* E-mail: hirschb@si.edu

## Introduction

Kinship plays a key role in shaping animal societies, particularly in group-living species. In many societies, animals preferentially associate with kin, direct affiliative behaviors toward close relatives, and support close kin during agonistic interactions [1]. The role of kinship is thought to be particularly important in species that live in long-lasting, socially cohesive groups with sex-biased dispersal. In species that exhibit female philopatry, female relatives often support each other during agonistic interactions. Female dominance rank is greatly influenced by the number and dominance status of close kin [2–5], and dominance status can greatly influence stress hormone levels, food intake rates, longevity, and reproductive success [6–9]. Despite recent criticism of inclusive fitness models, kinship has been shown to be a major force shaping the evolution and structure of animal societies [10–12].

In addition to the key influence that genetic relatedness has on social organization, other factors including feeding ecology, competitive regime, and demography are also important. For example, socioecological models of resource distribution and feeding competition have been used to predict the presence and degree of nepotism in primate groups [13–14]. The inclusion of additional parameters such as the risk of infanticide and habitat

saturation have created expanded socioecological models that can predict female grouping in gorillas and lions, and the formation of ‘friendships’ in chacma baboons (*Papio cynocephalus ursinus*) [15–19]. Within a social group, age, sex, social status, and hunger level can greatly influence an individual’s choice of whom to interact with and in what manner [20–24]. Some species exhibit age-based homophily, in which individuals preferentially interact with conspecifics of the same age, regardless of relatedness [25]. Even temporary behavioral states, such as an individual’s hunger level, have been found to change spatial association patterns and food related aggression [26–27]. Researchers have increasingly used social network analyses to address how these factors shape animal societies [28–29]. For example, Wey and Blumstein [23] used a network approach to determine that yellow-bellied ‘marmot colonies are largely organized based on age group and kinship.’

Ring-tailed coatis (*Nasua nasua*) are social carnivores that live in cohesive female philopatric groups. Unlike other coati species, each ring-tail coati group typically contains one adult male, except during the <1 month mating season, when several adult males can be found associating with each group [30]. Because coatis feed on contestable food resources and are female philopatric, we originally predicted that the ring-tailed coati social system would resemble primate groups with matrilineal dominance hierarchies [31–32]. However, the patterns of dominance observed in this

species are apparently unique in that juveniles rank higher in the dominance hierarchy than adult females and subadults, which results in priority feeding access at fruit trees [33]. This does not appear to be related to patterns of ‘youngest ascendancy’ or ‘age-inversed dominance hierarchies’ found in some primate species [34–38]. Instead, almost all juveniles were ranked higher in the dominance hierarchy than all adults and subadults [32]. Given this atypical dominance hierarchy, it was suggested that maternal rank and kinship played little or no role in shaping the dominance rank of individual coatis [32]. These patterns contrast to previous work in coatis (*Nasua narica* and *N. nasua*) that have demonstrated or strongly suggested that kinship plays a major role in shaping aggressive interactions and coalitionary support [39–40]. Further evidence suggests that adult females support non-offspring in dominance interactions, although this conclusion was based on maternity inferred from grooming behavior and not genetic data [32]. In addition, patterns of age-based homophily were found in regard to spatial association, and differences in rank appeared to influence particular age-sex classes to locate themselves in different within-group spatial positions [33], [41].

In the current study, we use social network analyses to determine the degree to which genetic relatedness influences the structure of three types of coati social networks: 1) spatial association, 2) grooming, and 3) aggressive interactions. Social network analysis allows for the quantification of multi-actor interactions, which provides a more realistic depiction of animal societies than traditional dyadic measures. With the use of these statistical and descriptive methods, it is possible to determine the degree to which kinship, age, and sex contribute to behavioral interactions between individuals and shape social structure. Although previous evidence suggested that kinship is not a major factor driving patterns of ring-tailed coati aggression, this hypothesis has never been explicitly tested. With the use of genetic markers we calculated relatedness between individuals and confirmed the identity of mother-offspring pairs. Here we test two non-mutually exclusive hypotheses: 1) Kinship explains the structure of coati social networks and 2) Age-sex class homophily explains the structure of coati social networks. Our predictions for each behavioral dimension are as follows:

### Association

**Relatedness.** Relatedness will be a significant predictor of association network structure. This pattern should hold between and among age and sex class categories.

**Age-sex.** Age and/or sex class homophily will be a significant predictor of the association network structure with higher association coefficients between members of the same age and sex class.

### Grooming

**Relatedness.** Relatedness will be a significant predictor of grooming network structure, with higher relatedness resulting in increased grooming rates. In particular, we predict that mother-offspring pairs should groom each other more frequently than more distantly related dyads.

**Age-sex.** Age and/or sex class homophily will be a significant predictor of the grooming network structure with more interactions between members of the same age and sex classes.

### Aggression

**Relatedness.** Relatedness will be a significant predictor of aggression network structure, with individuals directing less aggression towards related individuals [41].

**Age-sex.** Alternately, because coati dominance hierarchies have previously been reported to be ‘age structured’ we predict that relatedness could have little effect on aggressive networks [32] and age and/or sex class homophily will be a significant predictor of aggression network structure. Furthermore, if aggressive networks are primarily shaped by age and/or sex class homophily, we predict that particular age-sex classes will be more central in the dominance network structure, and give or receive more aggression than other age-sex classes.

Finally, because polyadic agonistic interactions can influence the structure of dyadic aggression networks, we conducted an additional analysis to determine the degree to which adult female coalitionary support for juveniles is shaped by kinship.

### Coalition formation

**Relatedness.** Adult females should preferentially support their offspring and/or closely related juveniles in agonistic interactions.

**Age-sex.** Adult females should support all juveniles during agonistic interactions, regardless of the degree of relatedness between the adult female and juvenile [32].

## Methods

### Ethics statement

This study complied with all institutional, national and ASAB / ABS guidelines for animal welfare. Local permission was granted from APN (Argentina National Park service) and animal handling procedures were approved by the SUNY Stony Brook Institutional Animal Use and Care Committee (IACUC# 20021175).

### Study site, subjects, and data collection

Behavioral data were collected in Iguazu National Park, Argentina (54°W, 26°S), between July 2002 and December 2004. A total of 150 coatis were captured in 32×10×12 inch Tomahawk or similar traps, immobilized with Ketamine and Xylazine and fitted with unique combinations of multicolored ear tags for individual identification (Rototag ear tags, Dalton Co.). Data from two neighboring coati groups (PQ and PSG) for two study years (2003 and 2004) were used in this study (N = 65 individuals). These two groups were socially segregated, and individuals rarely interacted with members of other groups. All coatis in the two social groups were individually recognizable due to their ear tags except for young juveniles which had not yet been tagged (juveniles were typically tagged when 4 months old). Coati groups were well habituated to the presence of human observers and we were able to follow habituated individuals within 2 m without disturbing them. Coati groups were comprised of adult females (24 months of age or older), subadults (12–24 months of age), juveniles (2–12 months of age), and one adult male (generally 36 months or older). Adult males disperse from their natal groups at 2 years of age, while females remain in their groups. Although group composition changed from year to year, group membership was relatively stable during the two study periods [41–42]. Any individual who died or dispersed during the study period was excluded from the analyses of that particular group-year (number of individuals included in the analyses for PSG 2003 = 12, PQ 2003 = 15, PSG 2004 = 25, PQ 2004 = 29). Most individuals changed age class from one year to the next, with the exception of the two adult males, 3 adult females in the PQ group, and 5 adult females in the PSG group.

All agonistic interactions were recorded ad libitum by the author, or by field assistants trained for at least 2 months [32]. Inter-observer reliability was tested during simultaneous observa-

tions of aggressive and grooming behavior, and field assistants were required to record interactions at  $\geq 95\%$  accuracy before their data were used. The winner of an interaction was defined following Gompper [43]: if one individual directed aggression towards a conspecific, and the recipient exhibited submissive behavior, the recipient was considered the loser. If an individual gained or maintained possession of a food item after an agonistic interaction, they were defined as the winner. A total of 1018 dyadic agonistic interactions were used in our analyses of aggressive behavior. These interactions included fights, chases, biting, lunges, aggressive vocalizations, displacements, and avoidances [32]. Dominance ranks were calculated using the MatMan program and results are presented in Hirsch [32]. Any interaction which involved more than two individuals was used in a separate analysis of coalitionary interactions [32]. Agonistic events were classified as a coalition when two individuals directed aggression at a third, or a third individual came to the aid of another during an agonistic event. A total of 37 coalitionary interactions involved an adult female aiding a juvenile. Grooming data were recorded ad libitum along with the identity of the individual grooming, recipient of grooming, or if the individuals were mutual grooming (total grooming bouts  $N = 1012$ ). Grooming bouts were commonly observed during periods when the entire group would stop and rest in a safe location (such as a sleeping site or cliff edge). Almost all dominance interactions occurred during feeding and foraging (96.8% of occurrences) and aggression was particularly common when feeding on clumped fruit resources [32].

Ten second individual focal samples were recorded to determine levels of association between individuals [33], [41]. During a focal sample, the identity of all individuals within 3 m of the focal individual was recorded. This distance was chosen because the fruit species most commonly eaten by coatis (*Syagnus romanzoffianum*) has a fruit shadow of roughly 3 m radius [44–45], and thus this distance is biologically relevant for feeding competition and aggressive interactions sensu [46]. Relatively short focal samples were used because many of the associated variables recorded during the samples changed frequently (particularly the number and identity of neighbors within 3 m). Due to poor overall visibility in the dense forest, it was not feasible to select individuals based on a pre-determined order. Individuals were selected opportunistically, and the same focal individual was not resampled within ten minutes. Adults were preferentially targeted over juveniles, especially during 2004 when both groups had large numbers of juveniles. Due to a delay in trapping the PQ 2004 juveniles, a relatively low number of association scan samples were collected ( $N = 223$ ), thus this group-year was excluded from the association network analyses (PQ 2003  $N = 1306$ , PSG 2003  $N = 1376$ , PSG 2004  $N = 770$ ).

### Genetic analyses

When individuals were captured, a small plug of skin tissue was punched out during ear tagging and the tissue was stored in 10% DMSO saline solution. DNA purification was carried out using a Qiagen Bio-Sprint 96 workstation following the protocol for DNA extraction from animal tissues as supplied by the manufacturer. All individuals were genotyped at 15 previously developed microsatellite loci which averaged 4.2 alleles per locus (range 2–7) [47–51]. Optimized PCR temperatures and reaction conditions for all loci are detailed in Hirsch and Maldonado [52]. Products were electrophoresed through an ABI 3130xl genetic analyzer and fragment size analysis was performed using the GeneMapper software (Applied Biosystems, Inc., Foster City, CA). All samples were amplified and genotyped at least two times for each locus. We used the program CERVUS 3.0 to determine mother-

offspring pairs [52–53] and *Relatedness* 5.0 [54] to calculate pairwise relatedness based on the allele frequencies of all adult individuals in the population. We found no evidence for null alleles or linkage disequilibrium in our population [52].

### Social networks

Three social networks were built for each group for each year based on matrices of: 1) association, 2) grooming interactions, and 3) aggressive interactions. In the association network a connection, or tie, existed between any two individuals who were observed associated as defined above. These ties were weighted based on that dyad's halfweight coefficient, which is a commonly used measure of association. The halfweight coefficient is essentially a corrected ratio that accounts for differences in sighting frequency or sampling effort by comparing the number of times individuals were seen together to the number of times they were seen in total and is calculated as  $X/(X+0.5(Y_a+Y_b))+Y_{ab}$  where  $X$  = number of times individuals  $a$  and  $b$  were observed together,  $Y_a$  is the number of observations where  $a$  was observed without  $b$ ,  $Y_b$  is the number of observations in which  $b$  was observed without  $a$ , and  $Y_{ab}$  is the number of observations  $a$  and  $b$  were both observed, but in separate groups [55]. All association-based social networks were undirected. Grooming networks were built from grooming interaction data and ties were weighted based on the number of grooming events that occurred between dyads. Grooming networks were directed such that ties were outgoing from the actor and incoming to the recipient. Aggression networks were also directed and constructed similar to grooming networks using the results of agonistic interactions. Halfweight coefficients were calculated in SocProg 2.4 [56].

### Statistical analyses

We used multiple regression quadratic assignment procedures (MRQAP) with the double semi-partialing permutation method to determine what factors influenced social structure in the coati groups [57]. The MRQAP is an extension of the Mantel test which allows for a dependent matrix to be regressed against multiple independent matrices [58]. We conducted three separate MRQAPs with association, grooming, and aggressive interactions as the dependent matrices, while age-based homophily, sex-based homophily, genetic relatedness, and mother-offspring pair as the independent matrices. For the homophily matrices, similar dyads received a value of 1, while dissimilar dyads received a value of 0. In the mother-offspring matrices, adult female and juvenile offspring pairs received a value of 1, while all other dyads were coded as 0. Mother-subadult offspring were coded as 0 in this matrix. MRQAP regressions were run in UCINET 6.3 [59].

We investigated general differences between age-sex classes with respect to grooming and aggression network measures. Three measures of centrality were calculated for each individual in each network: in-strength, out-strength, and eigenvector centrality. In-strength centrality (also known as weighted in-degree) is defined as the sum of the weights of all incoming ties, where as out-strength (weighted out-degree) is the sum of the weights of all outgoing ties. Eigenvector centrality is the corresponding eigenvalue of the first eigenvector of a given matrix and is a measure of both direct and indirect connectedness [29], [60]. Centrality measures were normalized based on group size to facilitate comparison between networks. All network centrality metrics were calculated using the igraph package for R 2.13 [61–62].

Patterns of coalitionary support were assessed by comparing the number of observed cases of mother-offspring coalitionary support to the predicted number if females randomly aided all juveniles. We also tested whether adult females preferentially supported

closely related juveniles (i.e. not just offspring). We compared the average degree of relatedness between juveniles and the adult females that supported them to the average pair-wise relatedness of social group members using ANOVA tests carried out in JMP 5.1.

## Results

### MRQAP Regressions

The mother-offspring matrices were significant predictors of the association and grooming networks in all group-years (Table 1). Genetic relatedness was significantly related to grooming and association patterns in almost all group-years, but only when mother-offspring matrices were not included in the MRQAP regressions. The addition of a matrix of same-age maternal siblings (i.e. nestmates) did not yield significant results in relation to grooming, association, or dominance in any of the four group-years. The MRQAP regressions did not reveal significant, directionally consistent sex-based homophily in any network. Age-class homophily, however, was a significant predictor of association and grooming patterns in some cases. Juvenile homophily was a significant predictor of association (all  $P$ -values  $< 0.002$ ), while subadult homophily was a significant predictor in one group-year and trended in the same direction in another group-year (PQ 2003  $P = 0.075$ , PSG 2004  $P = 0.001$ ). Interestingly, there was no effect of relatedness or mother-offspring pairs on dyadic aggressive behavior (Table 1).

### Grooming network metrics

Adult females groomed each other more often than predicted (in three out of four group-years) but this age homophily pattern was not seen in the grooming behavior of juveniles and subadults (Table 1). Adult females groomed others more than all other age-sex classes, while adult males received the most grooming (Figure 1, Table 2).

### Aggression network metrics

Males were more central in the aggression network than females (average eigenvector centrality males =  $52.974 \pm 25.128$  SD, females =  $23.839 \pm 15.698$ ) and directed more aggression than females (average normalized out strength degree males =  $47.134 \pm 52.683$ , females =  $16.910 \pm 22.192$ ). Adult males were particularly aggressive, and directed more aggression than other age-sex classes (Figure 2, Table 3). Male juveniles also had higher aggression out-strength values than juvenile females (males =  $41.087 \pm 43.901$ , females =  $13.906 \pm 13.351$ , Table 3).

### Coalitions

A total of 37 cases of adult female coalitionary support of juveniles were recorded in the two main study groups during 2003–2004. If adult females (3–5 per group-year) randomly gave support to all juveniles, it was expected that juveniles would be supported by their mother in 8 incidences. We found that mothers supported their offspring twice as much as random (16 cases), but a larger proportion of adult female support for juveniles was from non-mothers (57%). No between group differences were found in

**Table 1.** MRQAP regression results for association, grooming, and aggression networks in two social groups (PQ and PSG) during 2003 and 2004.

| Groups:              | PQ 2003 |        | PQ 2004 |        | PSG 2003 |        | PSG 2004 |        |
|----------------------|---------|--------|---------|--------|----------|--------|----------|--------|
|                      | slope   | P      | slope   | P      | slope    | P      | slope    | P      |
| <b>Association</b>   |         |        |         |        |          |        |          |        |
| Mother-offspring *** | 0.338   | 0.002* | -       | -      | 0.207    | 0.005* | 0.241    | 0.001* |
| Relatedness          | 0.044   | 0.325  | -       | -      | 0.068    | 0.216  | 0.033    | 0.292  |
| Sex                  | 0.014   | 0.374  | -       | -      | 0.009    | 0.430  | 0.084    | 0.043* |
| Adult                | 0.071   | 0.205  | -       | -      | 0.014    | 0.433  | 0.013    | 0.420  |
| Subadult             | 0.127   | 0.075  | -       | -      | -        | -      | 0.205    | 0.001* |
| Juvenile ***         | 0.682   | 0.002* | -       | -      | 0.835    | 0.001* | 0.372    | 0.001* |
| <b>Grooming</b>      |         |        |         |        |          |        |          |        |
| Mother-offspring *** | 0.568   | 0.001* | 0.689   | 0.001* | 0.569    | 0.001* | 0.527    | 0.001* |
| Relatedness          | 0.063   | 0.179  | -0.012  | 0.298  | -0.017   | 0.440  | -0.031   | 0.208  |
| Sex                  | 0.034   | 0.283  | 0.009   | 0.324  | 0.081    | 0.179  | 0.056    | 0.054  |
| Adult ***            | 0.077   | 0.125  | 0.226   | 0.001* | 0.252    | 0.007* | 0.390    | 0.001* |
| Subadult             | 0.121   | 0.049* | -       | -      | -        | -      | 0.027    | 0.134  |
| Juvenile             | -0.129  | 0.028* | -0.037  | 0.071  | -0.020   | 0.421  | -0.065   | 0.088  |
| <b>Aggression</b>    |         |        |         |        |          |        |          |        |
| Mother-offspring     | -0.069  | 0.191  | -0.024  | 0.260  | -0.024   | 0.424  | -0.026   | 0.334  |
| Relatedness          | 0.058   | 0.233  | -0.012  | 0.407  | 0.095    | 0.248  | 0.047    | 0.175  |
| Sex                  | 0.150   | 0.004* | -0.064  | 0.076  | -0.221   | 0.015* | 0.046    | 0.110  |
| Adult                | -0.014  | 0.490  | 0.064   | 0.073* | 0.017    | 0.419  | -0.013   | 0.455  |
| Subadult             | -0.066  | 0.049* | -       | -      | -        | -      | 0.003    | 0.377  |
| Juvenile             | -0.070  | 0.246  | -0.024  | 0.357  | 0.116    | 0.184  | -0.052   | 0.268  |

Age class categories represent age homophily. No subadults were present in the PQ 2004 and PSG 2003 groups. Significant predictor variables ( $P < 0.05$ ) for individual group-years = \*. Variables that were significant in at least three out of four group years = \*\*\*.  
doi:10.1371/journal.pone.0037301.t001



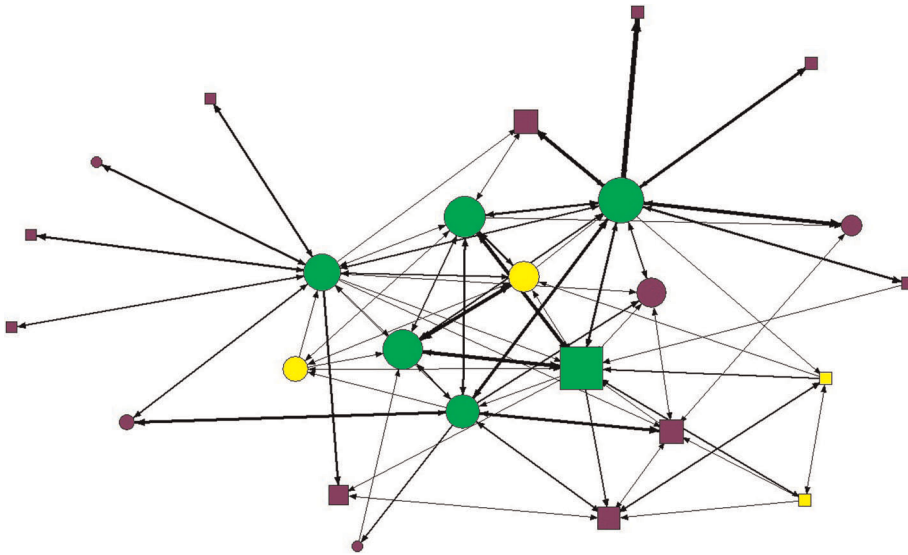

**Figure 1. Grooming interaction network from the PSG 2004 group.** The nodes represent individual coatis and the thickness of the lines between nodes is proportionate to the number of interactions between those individuals. Circles: females; squares: males; green: adults; yellow: subadults; purple: juveniles.

doi:10.1371/journal.pone.0037301.g001

the proportion of cases where adult females supported their offspring (PQ = 42%, PSG = 44%). Adult females also did not preferentially support closely related juveniles; the average degree of relatedness between juveniles and the adult females that supported them was not statistically different from the average degree of relatedness between individuals in the social group (ANOVA tests; PQ:  $F_{1,798} = 0.028$ ,  $P = 0.866$ ; PSG:  $F_{1,647} = 0.057$ ,  $P = 0.391$ ).

### Group relatedness

The two study groups varied in the degree to which individual coatis were related to each other, which likely arose from the distinct origins of the two groups. The PQ group was founded by a single adult female and her offspring in 2001, while the PSG group formed when five adult females split off from a larger group in late 2002 [63]. Adult females in the PQ group were more closely related to each other than adult females in the PSG group (average pairwise relatedness  $\pm$ SD: PQ =  $0.191 \pm 0.247$ ,

PSG =  $-0.020 \pm 0.299$ ,  $P = 0.02$ ). Because all PQ group members were the offspring of the founder adult female, pairwise relatedness in the PQ group was higher than in the PSG group (Figure 3; average pairwise relatedness, PQ =  $0.126 \pm 0.237$ , PSG =  $0.034 \pm 0.279$ ,  $P < 0.001$ ). One female in the PSG group (JW) was more distantly related to all other adult females (average pairwise relatedness to other adult females =  $-0.146 \pm 0.133$ ), despite the fact that no observed instances of adult female immigration or emigration were observed during the 2.5 year study period. The other four PSG adult females may have been pairs of sisters or other close female relatives (pairwise relatedness PS-GH = 0.693, NY-CM = 0.253).

### Discussion

Grooming and association matrices were shaped by mother-offspring associative behavior in all four group-years. This result demonstrates the strong link between genetic relatedness and associative behaviors in ring-tailed coatis. Interestingly, pairwise relatedness values were not a significant predictor of grooming and association when mother-offspring pairs were included in the MRQAP regressions. While juveniles were more often associated with other juveniles, they did not preferentially associate with their closest juvenile relatives (i.e. same age maternal siblings). These results are consistent with the idea that affiliative behaviors in coatis are strongly shaped by mother-offspring relations, while other kinship categories are less important (full and half siblings, aunts, etc.).

In general, age class homophily was a weak predictor of grooming network structure. Subadults and juveniles rarely groomed within their age class, but grooming among adults was a significant variable determining grooming network structure in three out of four group-years (Table 1). Adult females frequently groomed others, including juveniles, other adult females, and the adult male (Figure 1). The adult male in each group received more grooming than other age-sex classes (Table 2). This pattern was likely related to a behavior in which several coatis would simultaneously approach the adult male and groom him together

**Table 2. Average normalized grooming network eigenvector, out-strength, and in-strength values for each age-sex class  $\pm$  standard deviation.**

| Age-class       | N  | Eigenvector       | Out degree strength | In degree strength  |
|-----------------|----|-------------------|---------------------|---------------------|
| Adult female    | 10 | 0.622 $\pm$ 0.288 | 89.497 $\pm$ 64.325 | 44.305 $\pm$ 27.843 |
| Adult male      | 2  | 0.549 $\pm$ 0.203 | 35.874 $\pm$ 19.543 | 74.471 $\pm$ 53.047 |
| Subadult female | 4  | 0.373 $\pm$ 0.159 | 35.224 $\pm$ 21.114 | 21.448 $\pm$ 11.069 |
| Subadult male   | 2  | 0.080 $\pm$ 0.010 | 9.653 $\pm$ 2.275   | 4.826 $\pm$ 2.275   |
| Juvenile female | 25 | 0.224 $\pm$ 0.169 | 6.188 $\pm$ 10.380  | 22.061 $\pm$ 27.605 |
| Juvenile male   | 28 | 0.236 $\pm$ 0.179 | 11.709 $\pm$ 14.909 | 23.387 $\pm$ 21.371 |

N = number of individuals. Adult females groomed others the most, while adult males received the most grooming. Values were averaged across groups and years.

doi:10.1371/journal.pone.0037301.t002

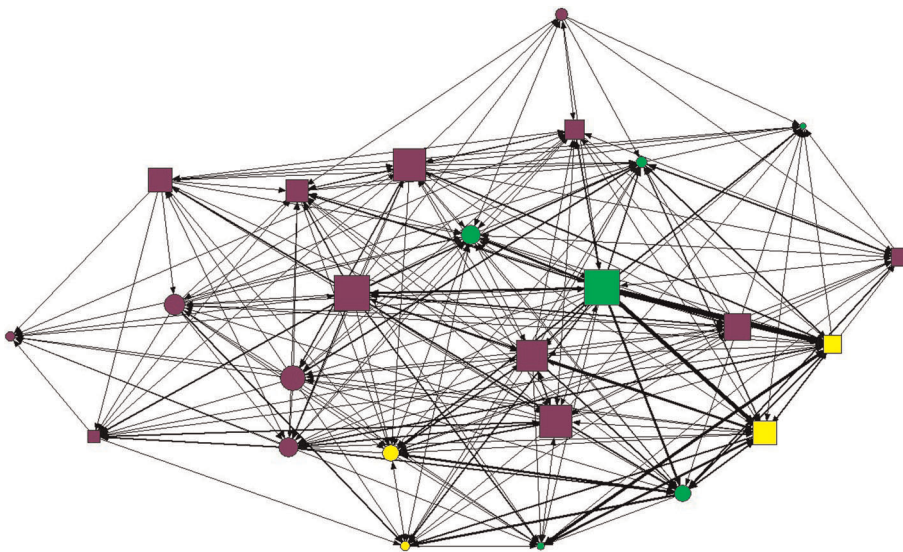

**Figure 2. Aggressive interaction network from the PSG 2004 group.** The nodes represent individual coatis and the thickness of the lines between nodes is proportionate to the number of interactions between those individuals. Circles: females; squares: males; green: adults; yellow: subadults; purple: juveniles.

doi:10.1371/journal.pone.0037301.g002

or in succession. This behavior occurred most frequently when the adult male rejoined the group after briefly leaving (typically for 0.25–12 hours). We suspect that these greeting behaviors may function to reinforce social bonds (cf. [64]).

Adult females frequently groomed each other, even though foraging adult females were not always within close proximity. These patterns contrast strongly with juveniles and subadults who rarely groomed within their age class, but generally associated with their same age class during foraging [33], [41]. We posit that the association and grooming matrices are measuring two different aspects of affiliative behavior. Grooming behavior is likely a better measure of social bonding, whereas spatial associations may be primarily shaped by socio-ecological factors such as predation and feeding competition. Individuals of different body size, foraging needs, and dominance status may choose, or be forced into, different within-group spatial positions (reviewed in: [65–66]). Similar patterns of age and size assortative behavior have been found in many other vertebrate species (fish-[21], [67], ungulates-

[68], primates-[69–71]). A previous study of these coati groups found that juveniles preferred to be at the front edge of the group to arrive first at quickly depleted fruit trees, while subadults were forced to the group margins by aggressive adult females [33], [41], [43]. It appears that the proximity matrices are largely being shaped by feeding competition and aggression, while grooming patterns are shaped by mother-offspring bonds, female-female social relationships, and a strong social attraction to adult males.

Aggression network structure was not explained by kinship, or mother-offspring pairs. Indeed, it appears that none of the tested parameters reliably predicted the structure of aggression networks. Although no age or sex class homophily variables were significant predictors of the overall dominance network structure, a closer comparison of the direction of interactions within and between age-sex classes demonstrated clear patterns. Not surprisingly, adult males were particularly aggressive (Figure 2). It has been posited that adult males who are better at fighting and chasing away other adult males are preferred by adult females [52]. Similarly, juvenile males were generally more aggressive than juvenile females. If these aggressive experiences during early social development lead to greater fighting ability as adults, increased juvenile male aggression could have an adaptive function [72]. Subadults received more aggression than all other age-sex classes. This behavior has previously been linked to coalitionary support for juveniles by adult females [32]. Typically, when a juvenile has an agonistic encounter with a subadult, one of the adult females in the group will come to the aid of the juvenile and violently chase the subadult, even when the adult female is the mother of the subadult. It is this support by adult females which allows juveniles to direct aggression towards subadults with little fear of serious reprisals.

The patterns of coalitionary support between adult females and juveniles are only marginally consistent with the hypothesis that adult females preferentially support their offspring during aggressive interactions. Juveniles were supported by adult females that were not their mothers during more than half of these coalitionary interactions (57%). It is plausible that patterns of coalitionary support found in ring-tailed coatis could have arisen due to

**Table 3. Average aggression network eigenvector, out-strength, and in-strength values for each age-sex class  $\pm$  standard deviation.**

| Age-class       | N  | Eigenvector       | Out degree strength  | In degree strength  |
|-----------------|----|-------------------|----------------------|---------------------|
| Adult female    | 10 | 0.431 $\pm$ 0.190 | 22.419 $\pm$ 31.460  | 42.066 $\pm$ 30.989 |
| Adult male      | 2  | 0.685 $\pm$ 0.373 | 105.399 $\pm$ 87.312 | 26.820 $\pm$ 28.192 |
| Subadult female | 4  | 0.440 $\pm$ 0.373 | 10.859 $\pm$ 14.522  | 63.935 $\pm$ 70.177 |
| Subadult male   | 2  | 0.739 $\pm$ 0.004 | 15.255 $\pm$ 6.780   | 39.226 $\pm$ 3.698  |
| Juvenile female | 25 | 0.266 $\pm$ 0.144 | 13.906 $\pm$ 13.351  | 19.989 $\pm$ 23.071 |
| Juvenile male   | 28 | 0.423 $\pm$ 0.251 | 41.087 $\pm$ 43.901  | 24.957 $\pm$ 26.723 |

N = number of individuals. Adult and juvenile males directed the most aggression to others, while adult females and subadults received the most aggression. Values were averaged across groups and years.

doi:10.1371/journal.pone.0037301.t003

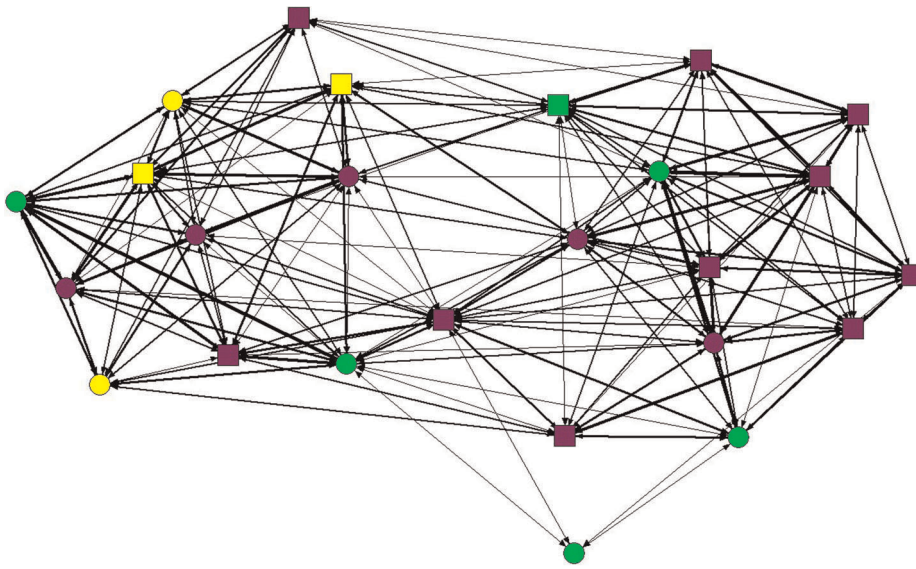

**Figure 3. Aggressive interaction network from the PSG 2004 group.** The nodes represent individual coatis and the thickness of the lines between nodes is proportionate to the degree of relatedness between those individuals. The bottommost adult female is JW, who was not closely related to the other adult group members. Circles: females; squares: males; green: adults; yellow: subadults; purple: juveniles.  
doi:10.1371/journal.pone.0037301.g003

inclusive fitness benefits, with adult females supporting closely related juveniles in addition to their own offspring. In the PQ group, where all adult females were closely related to all juveniles, inclusive fitness benefits could have easily led adult females to support all juveniles. On the other hand, there was variability in the degree of relatedness among group members. Even if most individuals were closely related, it was predicted that females should preferentially support their offspring during aggressive conflicts with their siblings, parents, and aunts. We found little evidence to support these patterns. In the PSG group, adult females were more distantly related to each other than females in the PQ group. The one adult female (JW) which was more distantly related to all other adult females still came to the aid of non-offspring juveniles ( $N = 5$ ). These patterns indicate that close kinship is not necessarily a prerequisite for coalitionary aid in this species. Our result that relatedness had no discernable effect on patterns of aggression is in stark contrast to most studies of aggression and dominance in social animals [1], [5], [73–75]. To our knowledge, this is the first example where genetic relatedness has little or no influence on agonistic behavior in a highly social mammal (for an avian example, see: [76]).

In some species, group augmentation has been posited as a hypothesis for female tolerance of juvenile aggressive behavior. Clutton-Brock and colleagues [77–79] found that larger meerkat groups are able to outcompete smaller groups, have lower costs of raising offspring, lower mortality, and higher breeding success. These authors concluded that meerkats likely aid young juveniles to augment group size, thus resulting in higher fitness levels for older group members. In our coati study population, we found no evidence that an increase in group size had a beneficial effect on the above factors, thus it does not appear to be a plausible reason for juvenile dominance in ring-tailed coatis [32].

The unusual age-based aggression patterns in ring-tailed coatis appear to fall outside the purview of widely used socio-ecological

and kinship based models of animal behavior. No previously published model of animal behavior would have predicted that adult females should direct aggression towards subadults regardless of their kinship ties, while coming to the aid of non-offspring juveniles. This coalitionary support provided by adult females is the major reason why juvenile coatis were able to feed in small patchy resources without being excluded by larger individuals, and thus provided a major fitness benefit to the youngest, most vulnerable age-class. Although previous studies have documented adult females preferentially aiding younger offspring in other species [7], [80], we know of no example in which adult females direct aggression towards older offspring in the defense of younger, non-offspring. We posit that although kinship based models of social aggression are widely applicable to a large number of animals, not all social mammals conform to their predictions, and studying these exceptions in further detail could lead to better future models predicting patterns of social aggression.

## Acknowledgments

We thank Yamil Di Blanco, Santiago Escobar, Carolina Ferrari, Mauro Tommone, Fermio Silva and Viviana Munoz for help and assistance during the course of the field work. Charles Janson provided essential support and guidance to BTH before, during, and after the field work. We thank Frank Hailer, Emily Latch, Nancy Rotzel, and especially Mirian Tsuchiya-Jerep for help with the genetics portion of this study. This paper benefited tremendously thanks to comments on earlier drafts by Meg Crofoot, Janet Mann, Jane Waterman and two anonymous reviewers.

## Author Contributions

Conceived and designed the experiments: BTH. Performed the experiments: BTH. Analyzed the data: BTH MAS JEM. Contributed reagents/materials/analysis tools: BTH MAS JEM. Wrote the paper: BTH MAS JEM.



## References

- Silk JB (2002) Kin selection in primates. *International Journal of Primatology* 23: 849–875.
- Engh A, Esch K, Smale L, Holekamp KE (2000) Mechanisms of maternal rank 'inheritance' in the spotted hyaena. *Animal Behaviour* 60: 323–332.
- Chapais B, Savard L, Gauthier C (2001) Kin selection and the distribution of altruism in relation to degree of kinship in Japanese macaques. *Behavioral Ecology & Sociobiology* 49: 493–502.
- Silk JB, Alberts SC, Altmann J (2004) Patterns of coalition formation by adult female baboons in Amboseli, Kenya. *Animal Behaviour* 67: 573–582.
- Smith JE, Van Horn RC, Powning KS, Cole AR, Graham KE, et al. (2010) Evolutionary forces favoring intragroup coalitions among spotted hyenas and other animals. *Behavioral Ecology* 21: 284–303.
- Janson CH (1985) Aggressive competition and individual food consumption in wild brown capuchin monkeys (*Cebus apella*). *Behavioral Ecology & Sociobiology* 18: 125–138.
- Van Noordwijk MA, Van Schaik CP (1999) The effects of dominance rank and group size on female lifetime reproductive success in wild long-tailed macaques, *Macaca fascicularis*. *Primates* 40: 109–134.
- Sapolsky RM (2005) The influence of social hierarchy on primate health. *Science* 308: 648–652.
- Silk JB, Beehner JC, Berman TJ, Crockford C, Engh AL, et al. (2010) Strong and consistent social bonds enhance the longevity of female baboons. *Current Biology* 20: 1359–1361.
- Bourke AFG (2011) The validity and value of inclusive fitness theory. *Proceeding of the Royal Society B* 278: 3313–3320.
- Gardner A, West SA, Wild G (2011) The genetical theory of kin selection. *Journal of Evolutionary Biology* 24: 1020–1043.
- Marshall JAR (2011) Group selection and kin selection: formally equivalent approaches. *Trends in Ecology & Evolution* 26: 325–332.
- van Schaik CP (1989) The ecology of social relationships amongst female primates. In: Standen V, Foley R, eds. *Comparative Socioecology of Mammals and Humans*, Oxford: Blackwell Publishers. pp 195–218.
- Janson CH (1992) Evolutionary ecology of primate social structure. In: Smith EA, Winterhalder B, eds. *Evolutionary ecology and human behavior*. New York: Aldine de Gruyter. pp 95–130.
- Sterck EHM, Watts DP, van Schaik CP (1997) The evolution of female social relationships in nonhuman primates. *Behavioral Ecology and Sociobiology* 41: 291–309.
- Watts DP (1989) Infanticide in mountain gorillas: new cases and a reconsideration of the evidence. *Ethology* 81: 1–18.
- Packer C, Scheel D, Pusey AE (1990) Why lions form groups: food is not enough. *American Naturalist* 136: 1–19.
- Palombit RA, Seyfert RM, Cheney DL (1997) The adaptive value of 'friendships' to female baboons: experimental and observational evidence. *Animal Behaviour* 54: 599–614.
- Henzi SP, Clarke PMR, van Schaik CP, Pradhan GR, Barrett L (2010) Proceedings of the National Academy of Science U S A 107: 2130–2135.
- Romey WL (1995) Position preferences within groups: do whirligigs select positions which balance feeding opportunities with predator avoidance? *Behavioral Ecology and Sociobiology* 37: 195–200.
- Croft DP, James R, Ward AJ, Botham MS, Mawdsley D, et al. (2005) Assortative interactions and social networks in fish. *Oecologia* 143: 211–219.
- Romey WL, Wallace AC (2007) Sex and the selfish herd: sexual segregation within nonmating whirligig groups. *Behavioral Ecology* 18: 910–915.
- Wey TW, Blumstein DT (2010) Social cohesion in yellow-bellied marmosets is established through age and kin structuring. *Animal Behaviour* 79: 1343–1352.
- Crofoot MC, Rubenstein DI, Maiya AS, Berger-Wolf TY (2011) Aggression, grooming and group-level cooperation in white-faced capuchins (*Cebus capucinus*): insights from social networks. *American Journal of Primatology* 73: 821–833.
- Krause J, Butlin R, Peuhkuri N, Pritchard VL (2000) The social organisation of fish shoals: a test of the predictive power of laboratory experiments for the field. *Biological Reviews* 75: 477–501.
- Janson CH, Vogel E (2006) Hunger and aggression in capuchin monkeys. *Feeding Ecology in Apes and Other Primates*. In: Hohmann G, Robbins MM, Boesch C, eds. *Ecological, Physical and Behavioral Aspects*. Cambridge: Cambridge University Press. pp 285–312.
- Romey WL, Galbraith E (2008) Optimal group positioning after a predator attack: the influence of speed, sex, and satiation within mobile whirligig swarms. *Behavioral Ecology* 19: 338–343.
- Croft DP, James R, Krause J (2008) *Exploring Animal Social Networks*. Princeton: Princeton University Press.
- Whitehead H (2008) *Analyzing animal societies*. Chicago: University of Chicago Press.
- Hirsch BT (2011) Long term adult male sociality in ring-tailed coatis (*Nasua nasua*). *Mammalia* 75: 301–304.
- Romero T, Aureli F (2007) Spatial association and social behaviour in zoo-living female ring-tailed coatis (*Nasua nasua*) *Behaviour* 144: 179–193.
- Hirsch BT (2007) Spoiled brats: an extreme form of juvenile dominance in the ring-tailed coati (*Nasua nasua*). *Ethology* 113: 446–456.
- Hirsch BT (2011) Spatial position and feeding success in ringtailed coatis. *Behavioral Ecology and Sociobiology* 65: 581–591.
- Hrdy SB, Hrdy DB (1976) Hierarchical relationships among female hanuman langurs (Primates: Colobinae, *Presbytis entellus*). *Science* 193: 913–915.
- Datta SB (1988) The acquisition of rank among freeranging rhesus monkey siblings. *Animal Behaviour* 36: 754–772.
- Datta SB (1991) Effects of group demography on dominance relationships among female primates I. Mother – daughter and sister – sister relations. *American Naturalist* 138: 201–226.
- Borries C, Sommer V, Srivastava A (1991) Dominance, age, and reproductive success in free-ranging female Hanuman langurs (*Presbytis entellus*). *International J Primatology* 12: 231–257.
- Chapais B (2004) How kinship generates dominance structures: a comparative perspective. In: Thierry B, Singh M, Kaumanns W, eds. *How Societies Arise: the Macaque Model*. Cambridge: Cambridge University Press.
- Romero T, Aureli F (2008) Reciprocity of support in coatis (*Nasua nasua*). *Journal of Comparative Psychology* 122: 19–25.
- Gompper ME, Gittleman JL, Wayne RK (1997) Genetic relatedness, coalitions, and social behavior of white-nosed coatis (*Nasua narica*). *Animal Behaviour* 53: 781–797.
- Hirsch BT (2011) Within-group spatial position in ring-tailed coatis: balancing predation, feeding competition, and social competition. *Behavioral Ecology and Sociobiology* 65: 391–399.
- Di Blanco Y, Hirsch BT (2006) Determinants of vigilance behavior in the ring-tailed coati (*Nasua nasua*): the importance of within-group spatial position. *Behavioral Ecology and Sociobiology* 61: 173–182.
- Gompper ME (1996) Sociality and asociality in white-nosed coatis (*Nasua narica*): foraging costs and benefits. *Behavioral Ecology* 7: 254–263.
- Hirsch BT (2009) Seasonal variation in the diet of ring-tailed coatis (*Nasua nasua*) in Iguazu, Argentina. *Journal of Mammalogy* 90: 136–143.
- Hirsch BT (2010) Tradeoff between travel speed and olfactory food detection in ring-tailed coatis (*Nasua nasua*). *Ethology* 116: 671–679.
- Hirsch BT (2002) Vigilance and social monitoring in brown capuchin monkeys (*Cebus apella*). *Behavioral Ecology and Sociobiology* 52: 458–464.
- Davis CS, Strobeck C (1998) Isolation, variability, and crossspecies amplification of polymorphic microsatellite loci in the family Mustelidae. *Molecular Ecology* 7: 1776–1778.
- Kays RW, Gittleman JL, Wayne RK (2000) Microsatellite analysis of kinkajou social organization. *Molecular Ecology* 7: 743–751.
- Fike JA, Drauch AM, Beasley JC, Dharmarajan G, Rhodes OR (2007) Development of 14 multiplexed microsatellite loci for raccoons *Procyon lotor*. *Molecular Ecology Notes* 7: 525–527.
- Siripunkaw CS, Kongrit C, Faries KM, Monello RJ, Gompper ME, et al. (2007) Isolation and characterization of polymorphic microsatellite loci in the raccoon (*Procyon lotor*). *Molecular Ecology Notes* 8: 199–201.
- Molecular Ecology Resources Primer Development Consortium (2010) Permanent genetic resources added to molecular ecology resources database 1 May 2009–31 July 2009. *Molecular Ecology Resources* 9: 1460–1559.
- Hirsch BT, Maldonado JE (2011) Familiarity breeds progeny: Male sociality increases reproductive success in adult male ringtailed coatis (*Nasua nasua*). *Molecular Ecology* 20: 409–419.
- Kalinowski ST, Taper ML, Marshall TC (2007) Revising how the computer program CERVUS accommodates genotyping error increases success in paternity assignment. *Molecular Ecology* 16: 1099–1106.
- Queller DC, Goodnight KF (1989) Estimating relatedness using genetic markers. *Evolution* 43: 258–275.
- Cairns SJ, Schwager SJ (1987) A comparison of association indices. *Animal Behaviour* 35: 1454–1469.
- Whitehead H (2009) SOCPROG programs: analysing animal social structures. *Behavioral Ecology and Sociobiology* 63: 765–778.
- Dekker D, Krackhardt D, Snijders TAB (2007) Sensitivity of MRQAP tests to collinearity and autocorrelation conditions. *Psychometrika* 72: 563–581.
- Krackhardt D (1988) Predicting with networks: nonparametric multiple regression analysis of dyadic data. *Social Networks* 10: 359–381.
- Borgatti S, Everett M, Freeman L (2006) UCINET for Windows: Software for Social Network Analysis. Lexington: Analytic Technologies.
- Wasserman S, Faust K (1994) *Social network analysis: methods and applications*. Cambridge, Cambridge University Press.
- Csardi G, Nepusz T The igraph software package for complex network research. *InterJournal Complex Systems* 1695. <http://igraph.sf.net>.
- R Development Core Team (2011) R: A language and environment for statistical computing. Vienna: R Foundation for Statistical Computing, ISBN 3-900051-07-0.
- Hirsch BT (2007) Within-group Spatial Position in Ring-Tailed Coatis (*Nasua nasua*): Balancing Predation, Feeding Success, and Social Competition. PhD Dissertation, Stony Brook University, Stony Brook, NY.
- Smith JE, Powning KS, Dawes SE, Estrada JR, Hopper AL, et al. (2011) Greetings promote cooperation and reinforce social bonds among spotted hyenas. *Animal Behaviour* 81: 401–415.
- Krause J (1994) Differential fitness returns in relation to spatial position in groups. *Biological Review* 69: 187–206.



66. Hirsch BT (2007) Costs and benefits of within-group spatial position: a feeding competition model. *Quarterly Review of Biology* 82: 9–27.
67. Aivaz AN, Ruckstuhl KE (2011) Costs of behavioral synchrony as a potential driver behind size-assorted grouping. *Behavioral Ecology* 22: 1353–1363.
68. Ruckstuhl KE, Neuhaus P (2001) Behavioral synchrony in ibex groups: effects of age, sex and habitat. *Behaviour* 138: 1033–1046.
69. Janson CH (1990) Social correlates of individual spatial choice in foraging groups of brown capuchin monkeys, *Cebus apella*. *Animal Behaviour* 40: 910–921.
70. Janson CH (1990) Ecological consequences of individual spatial choice in foraging groups of brown capuchin monkeys, *Cebus apella*. *Animal Behaviour* 40: 922–934.
71. Hall CL, Fedigan LM (1997) Spatial benefits afforded by high rank in white-faced capuchins. *Animal Behaviour* 53: 1069–1082.
72. Rodel HG, von Holst D (2009) Features of the early development predict competitive performance in male European rabbits. *Physiology and Behavior* 97: 495–502.
73. Koprowski JL (1996) Natal philopatry, communal nesting, and kinship in fox squirrels and gray squirrels. *Journal of Mammalogy* 77: 1006–1016.
74. Pravosudova EV, Grubb TC, Parker PG (2001) The influence of kinship on nutritional condition and aggression levels in winter social groups of Tufted Titmice. *Condor* 103: 821–828.
75. Wahaj SA, Van Horn RC, Van Horn TL, Dreyer R, Hilgrs R, et al. (2004) Kin discrimination in the spotted hyena (*Crocuta crocuta*): nepotism among siblings. *Behavioral Ecology and Sociobiology* 56: 237–247.
76. Toth Z, Bokony V, Lendvai AZ, Szabo K, Penzes Z, et al. (2009) Kinship and aggression: do house sparrows spare their relatives? *Behavioral Ecology and Sociobiology* 63: 1189–1196.
77. Clutton-Brock TH, Gaynor D, McIlrath GM, Maccoll ADC, Kansky R, et al. (1999) Predation, group size and mortality in a cooperative mongoose, *Suricata suricatta*. *Journal of Animal Ecology* 68: 672–683.
78. Kokko H, Johnstone RA, Clutton-Brock TH (2001) The evolution of cooperative breeding through group augmentation. *Proceedings of the Royal Society B* 268: 187–196.
79. Clutton-Brock TH (2002) Breeding together: kin selection and mutualism in cooperative vertebrates. *Science* 296: 69–72.
80. Schulman SR, Chapias B (1980) Reproductive value and rank relations among macaque sisters. *American Naturalist* 115: 580–593.
